# Supplementary material
Source: publisher figshare collection journal article supplement (https://sage.figshare.com/ndownloader/files/22256790)
Supplement: Supplementary file 1 [file 22256790]

## Supplementary table 1 – Baseline characteristics of participants vs. dropouts

(n=848)

| <i>Participant characteristics</i>                                                                   | <b>Participants (n=628)</b> | <b>Dropouts (n=220)</b> | <b>P-value</b>      |
|------------------------------------------------------------------------------------------------------|-----------------------------|-------------------------|---------------------|
| <i>Gender (% males)</i>                                                                              | 51.75%                      | 54.09%                  | <sup>a</sup> 0.550  |
| <i>Birthweight (kg)</i>                                                                              | 3.52 ± 0.51                 | 3.49 ± 0.60             | <sup>b</sup> 0.475  |
| <i>Maternal educational level</i>                                                                    |                             |                         |                     |
| <i>ISCED 1-3</i>                                                                                     | 21.97%                      | 23.64%                  |                     |
| <i>ISCED 4</i>                                                                                       | 8.28%                       | 12.27%                  |                     |
| <i>ISCED 5-6</i>                                                                                     | 42.83%                      | 42.73%                  |                     |
| <i>ISCED 7-8</i>                                                                                     | 26.91%                      | 21.36%                  | <sup>a</sup> 0.175  |
| <i>Maternal ethnicity</i><br>(% born in Denmark)                                                     | 95.06%                      | 90.91%                  | <sup>a</sup> 0.026* |
| <i>Fish consumption (days/month)</i>                                                                 | 8.41 ± 7.44                 | 7.34 ± 6.93             | <sup>b</sup> 0.062  |
| <i>BMI</i>                                                                                           |                             |                         |                     |
| <i>Grade 1-3 thinness</i>                                                                            | 13.85%                      | 12.73%                  |                     |
| <i>Normal weight</i>                                                                                 | 81.05%                      | 81.82%                  |                     |
| <i>Overweight/obese</i>                                                                              | 5.10%                       | 4.45%                   | <sup>a</sup> 0.903  |
| <i>Habitual sleep duration (hours)</i>                                                               | 11.12 ± 0.57                | 11.08 ± 0.54            | <sup>b</sup> 0.366  |
| <i>Physical activity level compared to peers</i><br>(% somewhat more or much more physically active) | 24.04%                      | 23.64%                  | <sup>a</sup> 0.903  |

Table 3 shows baseline characteristics of participants vs. dropouts in the prospective analysis. Data are presented as proportion (%) or mean (±SD) of the group. Significant differences (p<0.05) are marked \*. Categorical variables were compared using chi<sup>2</sup>-test (<sup>a</sup>). Continuous parametric variables were compared using a two-sample t-test (<sup>b</sup>).
